# Supplementary material for: Melatonin pulse treatment optimization: boosting vase life and postharvest quality in cut roses (Rosa hybrida cv. Samurai)
Source: BMC Plant Biol. 2026 May 9;26:1111. doi: 10.1186/s12870-026-08911-1 (PMC13326218; doi:10.1186/s12870-026-08911-1)
Supplement: Supplementary file 1 — Supplementary Material 1. [file 12870_2026_8911_MOESM1_ESM.xlsx]

## Sheet: Sheet1
method	concentraion	rep	vase_life	quality	flower_diameter_3	SPAD	chl_a	chl_b	chl_t	carotenoids	Antocyanin	EL	RWC	water_uptake	Fresh-to-Dry Weight Ratio	POD	CAT
1	1	1	6	3	43	45.1	1.2	0.48	1.68	0.3	258	33.13	72.03	36	27.03	2.22	3.62
1	1	2	6	4	43	45.6	1.35	0.5	1.85	0.28	272	44.41	72.34	34	26.35	2.33	3.6
1	1	3	6	3	44	45.8	1.1	0.44	1.54	0.28	272.3	35.9	70.15	33	26.14	2.31	3.59
1	2	1	6	3	43	45.1	1.2	0.48	1.68	0.3	258	33.13	72.03	36	27.03	2.22	3.62
1	2	2	6	4	43	45.6	1.35	0.5	1.85	0.28	272.2	44.41	72.34	34	26.35	2.33	3.6
1	2	3	6	3	44	45.8	1.1	0.44	1.54	0.28	272	35.9	72.15	33	26.14	2.31	3.59
2	1	1	10	5	50	54	1.6	0.64	2.24	0.36	354.2	27.87	78.64	40	30.2	3.79	3.97
2	1	2	9	5	49	56.5	1.5	0.6	2.1	0.38	367.15	28.19	79.64	41	32.1	3.71	3.92
2	1	3	10	5	50	56	1.55	0.62	2.17	0.33	367.6	28.03	81.4	39	31.45	3.7	3.89
2	2	1	9	4	46	52	1.28	0.51	1.79	0.31	299	31.33	74.34	37	28.99	3	3.84
2	2	2	8	3	47	50	1.38	0.55	1.93	0.34	313.28	30.69	75.67	38	29.4	3.17	3.88
2	2	3	9	4	47	52	1.42	0.57	1.99	0.3	313	31.14	75.6	36	28.42	3.19	3.84
3	1	1	9	5	50	52.5	1.48	0.59	2.07	0.28	354	21.3	79.9	40	30.1	3.55	3.91
3	1	2	9	5	51	52.5	1.52	0.61	2.13	0.35	367.89	24.65	78.9	40	30.24	3.44	3.9
3	1	3	9	5	52	50	1.57	0.63	2.2	0.37	367	19.21	79.15	39	30.54	3.61	3.89
3	2	1	8	4	46	49.1	1.18	0.47	1.65	0.31	354	34	74.56	38	28.99	3.11	3.78
3	2	2	8	3	46	49	1.23	0.49	1.72	0.33	340.65	33.15	73.56	37	28	3.24	3.7
3	2	3	8	3	45	48	1.27	0.51	1.78	0.3	340	32.16	73.54	37	28.4	3.18	3.71
